# Supplementary material for: Impact of COVID-19 on the HIV care continuum in Asia: Insights from people living with HIV, key populations, and HIV healthcare providers
Source: PubMed Central journal article supplement (PMC9299301; doi:10.1371/journal.pone.0270831), 2022-07-20
Supplement: pone.0270831.s001.pdf [file pone.0270831.s001.pdf]

**Table S1. Characteristics of respondents from people living with HIV (PLHIV) and key populations (KPs) in each country/territory.**

|                                                   | HK          | IN         | JP          | MY         | PH         | SG          | SK          | TW         | TH          | VN         |
|---------------------------------------------------|-------------|------------|-------------|------------|------------|-------------|-------------|------------|-------------|------------|
| <b>PLHIV</b>                                      |             |            |             |            |            |             |             |            |             |            |
| <b>Base</b>                                       | 50          | 58         | 25          | 225        | 81         | 22          | 112         | 66         | 31          | 32         |
| <b>Age (years)</b>                                |             |            |             |            |            |             |             |            |             |            |
| <i>Mean ± SD</i>                                  | 39.2 ± 11.4 | 37.5 ± 9.7 | 50.6 ± 7.8  | 34.6 ± 8.1 | 34.1 ± 6.3 | 37.3 ± 10.1 | 38.5 ± 10.2 | 37.3 ± 9.3 | 37.2 ± 10.7 | 30.8 ± 6.7 |
| 21-30                                             | 26.0%       | 24.1%      | -           | 32.9%      | 24.7%      | 31.8%       | 27.7%       | 24.2%      | 32.3%       | 56.3%      |
| 31-40                                             | 34.0%       | 44.8%      | 8.0%        | 48.0%      | 66.7%      | 27.3%       | 27.7%       | 43.9%      | 32.3%       | 34.4%      |
| 41-50                                             | 20.0%       | 19.0%      | 44.0%       | 15.1%      | 6.2%       | 31.8%       | 33.0%       | 21.2%      | 25.8%       | 9.4%       |
| 51-60                                             | 14.0%       | 10.3%      | 28.0%       | 3.1%       | 2.5%       | 9.1%        | 9.8%        | 10.6%      | 3.2%        | -          |
| ≥61                                               | 6.0%        | 1.7%       | 20.0%       | 0.9%       | -          | -           | 1.8%        | -          | 6.5%        | -          |
| <b>Gender</b>                                     |             |            |             |            |            |             |             |            |             |            |
| Male                                              | 98.0%       | 48.3%      | 100.0%      | 93.8%      | 95.1%      | 90.9%       | 100.0%      | 97.0%      | 87.1%       | 81.3%      |
| Female                                            | 2.0%        | 32.8%      | -           | 4.0%       | -          | 9.1%        | -           | 3.0%       | -           | 9.4%       |
| Transman                                          | -           | 1.7%       | -           | 0.4%       | -          | -           | -           | -          | -           | -          |
| Transwoman                                        | -           | 15.5%      | -           | 1.3%       | -          | -           | -           | -          | 3.2%        | 6.3%       |
| Gender-nonconforming                              | -           | -          | -           | -          | 3.7%       | -           | -           | -          | 6.5%        | 3.1%       |
| Prefer not to answer                              | -           | 1.7%       | -           | 0.4%       | 1.2%       | -           | -           | -          | 3.2%        | -          |
| <b>Sexual Orientation</b>                         |             |            |             |            |            |             |             |            |             |            |
| Bisexual                                          | 4.0%        | 51.7%      | 8.0%        | 22.7%      | 22.2%      | 9.1%        | 12.5%       | 10.6%      | 6.5%        | 3.1%       |
| Gay                                               | 86.0%       | 25.9%      | 92.0%       | 64.4%      | 77.8%      | 81.8%       | 83.0%       | 83.3%      | 90.3%       | 84.4%      |
| Lesbian                                           | -           | 1.7%       | -           | 0.9%       | -          | -           | -           | -          | -           | -          |
| Straight                                          | 10.0%       | 12.1%      | -           | 6.2%       | -          | 9.1%        | 2.7%        | 6.1%       | 3.2%        | 9.4%       |
| Other (e.g., pansexual, trans-sexual, non-sexual) | -           | 6.9%       | -           | 2.2%       | -          | -           | 0.9%        | -          | -           | -          |
| Prefer not to answer                              | -           | 1.7%       | -           | 3.6%       | -          | -           | 0.9%        | -          | -           | 3.1%       |
| <b>KPs</b>                                        |             |            |             |            |            |             |             |            |             |            |
| <b>Base</b>                                       | 27          | 32         | 23          | 41         | 41         | 9           | 174         | 104        | 41          | 59         |
| <b>Age (years)</b>                                |             |            |             |            |            |             |             |            |             |            |
| <i>Mean ± SD</i>                                  | 38.7 ± 11.1 | 35.1 ± 9.2 | 36.6 ± 11.3 | 31.4 ± 7.4 | 35.4 ± 8.9 | 34.4 ± 7.8  | 33.5 ± 8.0  | 33.5 ± 7.7 | 32.6 ± 7.5  | 27.5 ± 4.5 |
| 21-30                                             | 25.9%       | 37.5%      | 39.1%       | 56.1%      | 31.7%      | 33.3%       | 42.0%       | 38.5%      | 43.9%       | 81.4%      |

|                                                   |       |       |       |       |       |       |       |       |       |       |
|---------------------------------------------------|-------|-------|-------|-------|-------|-------|-------|-------|-------|-------|
| 31-40                                             | 37.0% | 34.4% | 26.1% | 29.3% | 43.9% | 44.4% | 38.5% | 46.2% | 43.9% | 17.0% |
| 41-50                                             | 18.5% | 25.0% | 21.7% | 14.6% | 19.5% | 22.2% | 17.2% | 12.5% | 9.8%  | 1.7%  |
| 51-60                                             | 14.8% | -     | 8.7%  | -     | 2.4%  | -     | 2.3%  | 2.9%  | 2.4%  | -     |
| ≥61                                               | 3.7%  | 3.1%  | 4.4%  | -     | 2.4%  | -     | -     | -     | -     | -     |
| <b>Gender</b>                                     |       |       |       |       |       |       |       |       |       |       |
| Male                                              | 74.1% | 46.9% | 73.9% | 53.7% | 85.4% | 88.9% | 97.7% | 96.2% | 63.4% | 91.5% |
| Female                                            | 22.2% | 3.1%  | 13.0% | 2.4%  | -     | 11.1% | -     | 3.9%  | 4.9%  | 1.7%  |
| Transman                                          | 3.7%  | 9.4%  | 4.4%  | 2.4%  | -     | -     | 0.6%  | -     | 2.4%  | -     |
| Transwoman                                        | -     | 34.4% | 4.4%  | 34.2% | 2.4%  | -     | 0.6%  | -     | 19.5% | 6.8%  |
| Gender-nonconforming                              | -     | -     | -     | 2.4%  | 7.3%  | -     | -     | -     | 4.9%  | -     |
| Prefer not to answer                              | -     | 6.3%  | 4.4%  | 4.9%  | 4.9%  | -     | 1.2%  | -     | 4.9%  | -     |
| <b>Sexual Orientation</b>                         |       |       |       |       |       |       |       |       |       |       |
| Bisexual                                          | 11.1% | 37.5% | 17.4% | 17.1% | 14.6% | 22.2% | 15.5% | 9.6%  | 9.8%  | 13.6% |
| Gay                                               | 59.3% | 46.9% | 73.9% | 36.6% | 80.5% | 55.6% | 82.8% | 85.6% | 70.7% | 78.0% |
| Lesbian                                           | 3.7%  | -     | -     | -     | -     | -     | -     | -     | -     | -     |
| Straight                                          | 22.2% | 3.1%  | 8.7%  | 22.0% | 2.4%  | 11.1% | -     | 4.8%  | 14.6% | 6.8%  |
| Other (e.g., pansexual, trans-sexual, non-sexual) | -     | 6.3%  | -     | 14.6% | 2.4%  | 11.1% | 1.7%  | -     | 4.9%  | -     |
| Prefer not to answer                              | 3.7%  | 6.3%  | -     | 9.8%  | -     | -     | -     | -     | -     | 1.7%  |

"-" indicate as no-responses recorded

HK, Hong Kong; IN, India; JP, Japan; MY, Malaysia; PH, Philippines; SG, Singapore; SK, South Korea; TW, Taiwan; TH, Thailand; VN, Vietnam
