# Supplementary material for: Impact of COVID-19 on the HIV care continuum in Asia: Insights from people living with HIV, key populations, and HIV healthcare providers
Source: PubMed Central journal article supplement (PMC9299301; doi:10.1371/journal.pone.0270831), 2022-07-20
Supplement: pone.0270831.s002.pdf [file pone.0270831.s002.pdf]

**Table S2. Characteristics of healthcare providers (HCPs) in each country/territory.**

|                                                   | <b>HK</b>  | <b>IN</b>  | <b>JP</b>  | <b>PH</b>  | <b>SG</b> | <b>SK</b>  | <b>TW</b>  | <b>TH</b>  | <b>VN</b> |
|---------------------------------------------------|------------|------------|------------|------------|-----------|------------|------------|------------|-----------|
| <b>Base</b>                                       | 7          | 34         | 6          | 33         | 6         | 9          | 32         | 11         | 7         |
| <b>Specialty</b>                                  |            |            |            |            |           |            |            |            |           |
| <i>Infectious Disease/HIV Specialist</i>          | 100.0%     | 94.1%      | 100.0%     | 78.8%      | 100.0%    | 100.0%     | 96.9%      | 54.6%      | 85.7%     |
| <i>General Practitioner</i>                       | -          | 5.9%       | -          | 21.2%      | -         | -          | 3.1%       | 45.5%      | 14.3%     |
| <b>Type of Hospital/Clinic§</b>                   |            |            |            |            |           |            |            |            |           |
| <i>Public/ Government / Restructured hospital</i> | 85.7%      | 17.7%      | 33.3%      | 27.3%      | 66.7%     | 22.2%      | n/a        | 63.6%      | 28.6%     |
| <i>Private hospital</i>                           | -          | 38.2%      | 16.7%      | 51.5%      | 33.3%     | 77.8%      | n/a        | 9.1%       | -         |
| <i>Private clinic</i>                             | 14.3%      | 32.4%      | 16.7%      | 9.1%       | -         | -          | n/a        | -          | 71.4%     |
| <i>Medical centre</i>                             | n/a        | n/a        | n/a        | n/a        | n/a       | n/a        | 65.6%      | n/a        | n/a       |
| <i>Regional hospital</i>                          | n/a        | n/a        | n/a        | n/a        | n/a       | n/a        | 28.1%      | n/a        | n/a       |
| <i>Area hospital</i>                              | n/a        | n/a        | n/a        | n/a        | n/a       | n/a        | 6.3%       | n/a        | n/a       |
| <i>Other</i>                                      | -          | 11.8%      | 33.3%      | 12.1%      | -         | -          | n/a        | 27.3%      | -         |
| <b>Years of Practice</b>                          |            |            |            |            |           |            |            |            |           |
| <i>Mean ± SD</i>                                  | 11.7 ± 4.9 | 19.5 ± 9.4 | 20.5 ± 6.3 | 10.2 ± 6.2 | 7.3 ± 4.5 | 10.1 ± 5.8 | 14.2 ± 7.1 | 13.6 ± 8.6 | 8.3 ± 3.7 |
| <i>≤ 5 years</i>                                  | 14.3%      | 2.9%       | -          | 33.3%      | 33.3%     | 33.3%      | 12.5%      | 27.3%      | 28.6%     |
| <i>6 - 10 years</i>                               | 14.3%      | 17.6%      | -          | 21.2%      | 50.0%     | 11.1%      | 21.9%      | 9.1%       | 42.9%     |
| <i>11 - 15 years</i>                              | 57.1%      | 26.5%      | 33.3%      | 24.2%      | 16.7%     | 33.3%      | 28.1%      | 18.2%      | 28.6%     |
| <i>15 - 20 years</i>                              | 14.3%      | 14.7%      | 16.7%      | 15.2%      | -         | 22.2%      | 15.6%      | 27.3%      | -         |
| <i>21 - 25 years</i>                              | -          | 5.9%       | 33.3%      | 6.1%       | -         | -          | 18.8%      | 9.1%       | -         |
| <i>&gt; 25 years</i>                              | -          | 32.4%      | 16.7%      | -          | -         | -          | 3.1%       | 9.1%       | -         |

“-” indicate as no-responses recorded

n/a indicate response not applicable for HCPs residing outside of TW.

HK, Hong Kong; IN, India; JP, Japan; MY, Malaysia; PH, Philippines; SG, Singapore; SK, South Korea; TW, Taiwan; TH, Thailand; VN, Vietnam
