# Supplementary material for: Impact of COVID-19 on the HIV care continuum in Asia: Insights from people living with HIV, key populations, and HIV healthcare providers
Source: PubMed Central journal article supplement (PMC9299301; doi:10.1371/journal.pone.0270831), 2022-07-20
Supplement: pone.0270831.s003.pdf [file pone.0270831.s003.pdf]

**Table S3. Perceived changes by people living with HIV (PLHIV) towards HIV care and prevention access during COVID-19 pandemic in each country/territory - hospital/clinic visit frequency, HIV-related tests, HIV antiretroviral therapy (ART) compliance, and telemedicine services.**

|                                                                                                                                               | PLHIV (%) |       |        |       |       |       |       |       |       |       |
|-----------------------------------------------------------------------------------------------------------------------------------------------|-----------|-------|--------|-------|-------|-------|-------|-------|-------|-------|
|                                                                                                                                               | HK‡       | IN‡   | JP     | MY‡   | PH‡   | SG    | SK‡   | TW‡   | TH‡   | VN‡   |
| <b>Access to Hospital/clinics and routine HIV-tests</b>                                                                                       |           |       |        |       |       |       |       |       |       |       |
| <b>Base</b>                                                                                                                                   | 50        | 58    | 25     | 225   | 81    | 22    | 112   | 66    | 31    | 32    |
| During COVID-19, how has your visit frequency to hospital/clinic changed compared with the pre-COVID period?                                  |           |       |        |       |       |       |       |       |       |       |
| <i>Increased</i>                                                                                                                              | 2.0%      | 15.5% | 4.0%   | 4.9%  | 2.5%  | 13.6% | 2.7%  | 3.0%  | 9.7%  | 9.4%  |
| <i>Remained the same</i>                                                                                                                      | 48.0%     | 29.3% | 76.0%  | 70.2% | 25.9% | 50.0% | 80.4% | 83.3% | 58.1% | 53.1% |
| <i>Decreased</i>                                                                                                                              | 28.0%     | 36.2% | 20.0%  | 21.3% | 37.0% | 27.3% | 13.4% | 10.6% | 19.4% | 31.3% |
| <i>Not yet visited any hospital</i>                                                                                                           | 22.0%     | 19.0% | -      | 3.6%  | 34.6% | 9.1%  | 3.6%  | 3.0%  | 12.9% | 6.3%  |
| During COVID-19, how has your frequency of HIV-related tests such as HIV RNA load changed compared with the pre-COVID period?                 |           |       |        |       |       |       |       |       |       |       |
| <i>Increased</i>                                                                                                                              | -         | 25.9% | 4.0%   | 4.9%  | 4.9%  | 4.6%  | 2.7%  | 1.5%  | 3.2%  | 3.1%  |
| <i>Remained the same</i>                                                                                                                      | 60.0%     | 53.5% | 88.0%  | 76.0% | 53.1% | 72.7% | 91.1% | 95.5% | 80.7% | 56.3% |
| <i>Decreased</i>                                                                                                                              | 40.0%     | 20.7% | 8.0%   | 19.1% | 42.0% | 22.7% | 6.3%  | 3.0%  | 16.1% | 40.6% |
| <b>Access to HIV antiretroviral therapy (ART) among PLHIV with prescriptions</b>                                                              |           |       |        |       |       |       |       |       |       |       |
| <b>Base</b>                                                                                                                                   | 50        | 58    | 25     | 225   | 81    | 22    | 112   | 66    | 31    | 32    |
| During COVID-19, have you ever interrupted your ART, i.e. stopped taking the treatment or did not follow the recommended dosing?              |           |       |        |       |       |       |       |       |       |       |
| <i>Yes</i>                                                                                                                                    | 10.0%     | 58.6% | 8.0%   | 10.2% | 8.6%  | 31.8% | 12.5% | 9.1%  | 54.8% | 18.8% |
| <i>No</i>                                                                                                                                     | 90.0%     | 41.4% | 92.0%  | 89.8% | 91.4% | 68.2% | 87.5% | 90.9% | 45.2% | 81.3% |
| How has the frequency of taking your ART changed compared with the pre-COVID period?                                                          |           |       |        |       |       |       |       |       |       |       |
| <b>Base</b>                                                                                                                                   | 5         | 34    | 2      | 23    | 7     | 7     | 14    | 6     | 17    | 6     |
| <i>Decreased</i>                                                                                                                              | 20.0%     | 50.0% | -      | 34.8% | 28.6% | 71.4% | 42.9% | 50.0% | 41.2% | 33.3% |
| <i>Stopped completely</i>                                                                                                                     | 20.0%     | 11.8% | -      | -     | -     | 28.6% | -     | -     | 5.9%  | 16.7% |
| <i>Others (e.g., based on doctor's advice, forgot some few doses)</i>                                                                         | 60.0%     | 38.2% | 100.0% | 65.2% | 71.4% | -     | 57.1% | 50.0% | 52.9% | 50.0% |
| Looking forward in a world that continues to be impacted of COVID-19, how concerned are you about your longer-term ability to access HIV ART? |           |       |        |       |       |       |       |       |       |       |
| <i>Concerned</i>                                                                                                                              | 40.0%     | 50.0% | 20.0%  | 62.2% | 82.7% | 72.7% | 35.7% | 28.8% | 29.0% | 90.6% |
| <i>Neutral</i>                                                                                                                                | 40.0%     | 41.4% | 12.0%  | 25.3% | 8.6%  | 9.1%  | 27.7% | 51.5% | 35.5% | 9.4%  |
| <i>Not Concerned</i>                                                                                                                          | 20.0%     | 8.6%  | 68.0%  | 12.4% | 8.6%  | 18.2% | 36.6% | 19.7% | 35.5% | -     |

| <b>Usage of Telemedicine services</b>                                                                                                                                                                |       |       |       |       |       |       |       |       |       |       |
|------------------------------------------------------------------------------------------------------------------------------------------------------------------------------------------------------|-------|-------|-------|-------|-------|-------|-------|-------|-------|-------|
| <b>Base</b>                                                                                                                                                                                          | 50    | 58    | 25    | 225   | 81    | 22    | 112   | 66    | 31    | 32    |
| What types of telemedicine services, e.g. receiving healthcare services remotely via the use of technology, e.g. mobile phone, tablet, computer, have you received from your doctor during COVID-19? |       |       |       |       |       |       |       |       |       |       |
| <i>Provided a phone consultation</i>                                                                                                                                                                 | 10.0% | 65.5% | 16.0% | 32.0% | 37.0% | 22.7% | 10.7% | 3.0%  | 45.2% | 18.8% |
| <i>Provided a video consultation</i>                                                                                                                                                                 | 16.0% | 10.3% | -     | 8.9%  | 37.0% | 4.6%  | 0.9%  | 3.0%  | 3.2%  | 6.3%  |
| <i>Provided to refill medications remotely</i>                                                                                                                                                       | 30.0% | 22.4% | 4.0%  | 42.2% | 64.2% | 9.1%  | 1.8%  | 28.8% | 6.5%  | 12.5% |
| <i>None of the above</i>                                                                                                                                                                             | 62.0% | 17.2% | 80.0% | 39.1% | 17.3% | 68.2% | 86.6% | 69.7% | 51.6% | 71.9% |
| What is your most preferred telemedicine service in the future?                                                                                                                                      |       |       |       |       |       |       |       |       |       |       |
| <i>Phone consultation with doctor/counsellor</i>                                                                                                                                                     | 22.0% | 55.2% | 24.0% | 31.1% | 12.4% | 13.6% | 57.1% | 24.2% | 48.4% | 28.1% |
| <i>Video consultation with doctor/counsellor</i>                                                                                                                                                     | 22.0% | 15.5% | 36.0% | 24.4% | 38.3% | 36.4% | 13.4% | 27.3% | 16.1% | 3.1%  |
| <i>Refill medications remotely</i>                                                                                                                                                                   | 52.0% | 27.6% | 32.0% | 39.1% | 44.4% | 36.4% | 24.1% | 45.5% | 29.0% | 62.5% |
| <i>Other</i>                                                                                                                                                                                         | 4.0%  | 1.7%  | 8.0%  | 5.3%  | 4.9%  | 13.6% | 5.4%  | 3.0%  | 6.5%  | 6.3%  |

‡Sample size of at least 30 is considered robust

“-” indicate as no-responses recorded

HK, Hong Kong; IN, India; JP, Japan; MY, Malaysia; PH, Philippines; SG, Singapore; SK, South Korea; TW, Taiwan; TH, Thailand; VN, Vietnam
