# Supplementary material for: Impact of COVID-19 on the HIV care continuum in Asia: Insights from people living with HIV, key populations, and HIV healthcare providers
Source: PubMed Central journal article supplement (PMC9299301; doi:10.1371/journal.pone.0270831), 2022-07-20
Supplement: pone.0270831.s004.pdf [file pone.0270831.s004.pdf]

**Table S4. Perceived changes by individuals within the key populations (KPs) towards HIV care and prevention access during COVID-19 pandemic in each country/territory - hospital/clinic visit frequency, HIV-related tests, HIV preventive medication compliance, and telemedicine services.**

|                                                                                                                                                               | KP (%)          |                 |                 |                 |                 |       |                 |                 |                 |                 |
|---------------------------------------------------------------------------------------------------------------------------------------------------------------|-----------------|-----------------|-----------------|-----------------|-----------------|-------|-----------------|-----------------|-----------------|-----------------|
|                                                                                                                                                               | HK <sup>‡</sup> | IN <sup>‡</sup> | JP <sup>§</sup> | MY <sup>‡</sup> | PH <sup>‡</sup> | SG    | SK <sup>‡</sup> | TW <sup>‡</sup> | TH <sup>‡</sup> | VN <sup>‡</sup> |
| <b>Access to Hospital/clinics and routine HIV-tests</b>                                                                                                       |                 |                 |                 |                 |                 |       |                 |                 |                 |                 |
| <b>Base</b>                                                                                                                                                   | 27              | 32              | 23              | 41              | 41              | 9     | 174             | 104             | 41              | 59              |
| During COVID-19, how has your visit frequency to hospital/clinic changed compared with the pre-COVID period?                                                  |                 |                 |                 |                 |                 |       |                 |                 |                 |                 |
| <i>Increased</i>                                                                                                                                              | 3.7%            | 6.3%            | -               | 7.3%            | -               | -     | 6.3%            | 7.7%            | 12.2%           | 1.7%            |
| <i>Remained the same</i>                                                                                                                                      | 37.0%           | 25.0%           | 34.8%           | 41.5%           | 19.5%           | 33.3% | 34.5%           | 62.5%           | 58.5%           | 33.9%           |
| <i>Decreased</i>                                                                                                                                              | 37.0%           | 31.3%           | 47.8%           | 29.3%           | 46.3%           | 55.6% | 40.8%           | 27.9%           | 17.1%           | 40.7%           |
| <i>Not yet visited any hospital</i>                                                                                                                           | 22.2%           | 37.5%           | 17.4%           | 22.0%           | 34.2%           | 11.1% | 18.4%           | 1.9%            | 12.2%           | 23.7%           |
| During COVID-19, how has your frequency of HIV testing changed compared with the pre-COVID period?                                                            |                 |                 |                 |                 |                 |       |                 |                 |                 |                 |
| <i>Increased</i>                                                                                                                                              | -               | 6.3%            | 4.4%            | -               | 2.4%            | 11.1% | 4.0%            | 2.9%            | 4.9%            | 5.1%            |
| <i>Remained the same</i>                                                                                                                                      | 59.3%           | 43.8%           | 39.1%           | 68.3%           | 31.7%           | -     | 45.4%           | 73.1%           | 70.7%           | 54.2%           |
| <i>Decreased</i>                                                                                                                                              | 40.7%           | 50.0%           | 56.5%           | 31.7%           | 65.9%           | 88.9% | 50.6%           | 24.0%           | 24.4%           | 40.7%           |
| <b>Access to HIV preventive medicine among KPs with prescriptions</b>                                                                                         |                 |                 |                 |                 |                 |       |                 |                 |                 |                 |
| <b>Base</b>                                                                                                                                                   | 5               | 9               | 0               | 10              | 16              | 4     | 8               | 38              | 26              | 42              |
| During COVID-19, how has the frequency of taking your HIV preventive medicine changed compared with the pre-COVID period?                                     |                 |                 |                 |                 |                 |       |                 |                 |                 |                 |
| <i>Increased</i>                                                                                                                                              | -               | -               | n/a             | -               | -               | -     | -               | 13.2%           | 3.9%            | 2.4%            |
| <i>Remained the same</i>                                                                                                                                      | 80.0%           | 55.6%           | n/a             | 60.0%           | 43.8%           | -     | 50.0%           | 76.3%           | 73.1%           | 66.7%           |
| <i>Decreased</i>                                                                                                                                              | 20.0%           | 22.2%           | n/a             | 40.0%           | 31.3%           | 75.0% | 25.0%           | 10.5%           | 11.5%           | 19.1%           |
| <i>Stopped completely</i>                                                                                                                                     | -               | 22.2%           | n/a             | -               | 25.0%           | 25.0% | 25.0%           | -               | 11.5%           | 11.9%           |
| Looking forward in a world that continues to be impacted of COVID-19, how concerned are you about your longer-term ability to access HIV preventive medicine? |                 |                 |                 |                 |                 |       |                 |                 |                 |                 |
| <i>Concerned</i>                                                                                                                                              | 40.0%           | 44.4%           | n/a             | 70.0%           | 62.5%           | 50.0% | 62.5%           | 29.0%           | 30.8%           | 45.2%           |
| <i>Neutral</i>                                                                                                                                                | 60.0%           | 33.3%           | n/a             | 30.0%           | 25.0%           | 50.0% | 12.5%           | 57.9%           | 38.5%           | 38.1%           |
| <i>Not Concerned</i>                                                                                                                                          | -               | 22.2%           | n/a             | -               | 12.5%           | -     | 25.0%           | 13.2%           | 30.8%           | 16.7%           |
| <b>Usage of Telemedicine services</b>                                                                                                                         |                 |                 |                 |                 |                 |       |                 |                 |                 |                 |
| <b>Base</b>                                                                                                                                                   | 27              | 32              | 23              | 41              | 41              | 9     | 174             | 104             | 41              | 59              |

| What types of telemedicine services, e.g., receiving healthcare services remotely via the use of technology, e.g. mobile phone, tablet, computer, have you received from your doctor during COVID-19? |       |       |        |       |       |       |       |       |       |       |
|-------------------------------------------------------------------------------------------------------------------------------------------------------------------------------------------------------|-------|-------|--------|-------|-------|-------|-------|-------|-------|-------|
| <i>Provided a phone consultation</i>                                                                                                                                                                  | 29.6% | 59.4% | -      | 36.6% | 14.6% | 33.3% | 5.2%  | 1.9%  | 31.7% | 57.6% |
| <i>Provided a video consultation</i>                                                                                                                                                                  | 11.1% | 18.8% | -      | 17.1% | 29.3% | 11.1% | -     | 4.8%  | 4.9%  | 13.6% |
| <i>Provided to refill medications remotely</i>                                                                                                                                                        | 18.5% | 6.3%  | -      | 19.5% | 14.6% | 33.3% | 0.6%  | 14.4% | 7.3%  | 23.7% |
| <i>None of the above</i>                                                                                                                                                                              | 66.7% | 34.4% | 100.0% | 56.1% | 58.5% | 55.6% | 94.3% | 82.7% | 61.0% | 32.2% |
| What is your most preferred telemedicine service in the future?                                                                                                                                       |       |       |        |       |       |       |       |       |       |       |
| <i>Phone consultation with doctor/counsellor</i>                                                                                                                                                      | 44.4% | 50.0% | 21.7%  | 36.6% | 26.8% | 11.1% | 35.1% | 25.0% | 61.0% | 45.8% |
| <i>Video consultation with doctor/counsellor</i>                                                                                                                                                      | 37.0% | 31.3% | 30.4%  | 34.2% | 61.0% | 22.2% | 23.6% | 51.0% | 17.1% | 20.3% |
| <i>Refill medications remotely</i>                                                                                                                                                                    | 14.8% | 9.4%  | 47.8%  | 26.8% | 7.3%  | 55.6% | 37.9% | 24.0% | 19.5% | 28.8% |
| <i>Other</i>                                                                                                                                                                                          | 3.7%  | 9.4%  | -      | 2.4%  | 4.9%  | 11.1% | 3.5%  | -     | 2.4%  | 5.1%  |

<sup>†</sup>Sample size of at least 30 is considered robust

<sup>§</sup>Japanese respondents from KPs has self-reported not being prescribed with HIV preventive medicine

"-" indicate as no-responses recorded

n/a indicate a response was not applicable

HK, Hong Kong; IN, India; JP, Japan; MY, Malaysia; PH, Philippines; SG, Singapore; SK, South Korea; TW, Taiwan; TH, Thailand; VN, Vietnam
